# Supplementary material for: Mineral-like Synthetic Compounds Stabilized under Hydrothermal Conditions: X-ray Diffraction Study and Comparative Crystal Chemistry
Source: MDPI journal article supplement (doi:10.3390/min14010046), 2023-12-29

## checkCIF/PLATON report

Structure factors have been supplied for datablock(s) shelx

THIS REPORT IS FOR GUIDANCE ONLY. IF USED AS PART OF A REVIEW PROCEDURE FOR PUBLICATION, IT SHOULD NOT REPLACE THE EXPERTISE OF AN EXPERIENCED CRYSTALLOGRAPHIC REFEREE.

No syntax errors found.      CIF dictionary      Interpreting this report

### Datablock: shelx

---

|                        |                                  |                                  |             |
|------------------------|----------------------------------|----------------------------------|-------------|
| Bond precision:        | P- O = 0.0020 A                  | Wavelength=0.71073               |             |
| Cell:                  | a=13.6243(2)                     | b=10.3531(2)                     | c=6.3586(1) |
|                        | alpha=90                         | beta=90                          | gamma=90    |
| Temperature:           | 150 K                            |                                  |             |
|                        | Calculated                       | Reported                         |             |
| Volume                 | 896.90(3)                        | 896.90(3)                        |             |
| Space group            | C m c m                          | C m c m                          |             |
| Hall group             | -C 2c 2                          | -C 2c 2                          |             |
| Moiety formula         | Cl4 Cu14.96 Na1.04 O36 P8, 8(Na) | Cl4 Cu14.96 Na1.04 O36 P8, 8(Na) |             |
| Sum formula            | Cl4 Cu14.96 Na9.04 O36 P8        | Cl Cu3.75 Na2.25 O9 P2           |             |
| Mr                     | 2124.10                          | 531.39                           |             |
| Dx, g cm <sup>-3</sup> | 3.933                            | 3.935                            |             |
| Z                      | 1                                | 4                                |             |
| Mu (mm <sup>-1</sup> ) | 9.556                            | 9.578                            |             |
| F000                   | 1009.3                           | 1010.0                           |             |
| F000'                  | 1016.10                          |                                  |             |
| h, k, lmax             |                                  | 19, 14, 8                        |             |
| Nref                   |                                  | 733                              |             |
| Tmin, Tmax             | 0.301, 0.516                     | 0.706, 1.000                     |             |
| Tmin'                  | 0.194                            |                                  |             |

Correction method= # Reported T Limits: Tmin=0.706 Tmax=1.000  
AbsCorr = MULTI-SCAN

Data completeness=      Theta(max)= 29.993

|                              |                                |
|------------------------------|--------------------------------|
| R(reflections)= 0.0170( 728) | wR2(reflections)= 0.0553( 733) |
| S = 0.992                    | Npar= 57                       |

---

The following ALERTS were generated. Each ALERT has the format  
**test-name\_ALERT\_alert-type\_alert-level.**

Click on the hyperlinks for more details of the test.

---

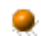

#### Alert level B

PLAT220\_ALERT\_2\_B NonSolvent    Resd 1 Cu    Ueq(max)/Ueq(min) Range    6.1 Ratio

---

**Author Response: Thermal ellipsoids of the Cu are elongated because Cu(I) atoms occupy t**

---

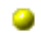

#### Alert level C

PLAT041\_ALERT\_1\_C Calc. and Reported SumFormula    Strings Differ    Please Check  
Calc: Cl Cu3.74 Na2.26 O9 P2  
Rep.: Cl Cu3.75 Na2.25 O9 P2  
PLAT250\_ALERT\_2\_C Large U3/U1 Ratio for Average U(i,j) Tensor ....    2.6 Note  
PLAT975\_ALERT\_2\_C Check Calcd Resid. Dens.    0.65Ang From O2    .    0.53 eA-3

---

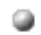

#### Alert level G

FORMU01\_ALERT\_1\_G There is a discrepancy between the atom counts in the  
\_chemical\_formula\_sum and \_chemical\_formula\_moiety. This is  
usually due to the moiety formula being in the wrong format.  
Atom count from \_chemical\_formula\_sum: Cl1 Cu3.75 Na2.25 O9 P2  
Atom count from \_chemical\_formula\_moiety: Cl4 Cu14.96 Na9.04 O36 P8  
CELLZ01\_ALERT\_1\_G Difference between formula and atom\_site contents detected.  
CELLZ01\_ALERT\_1\_G ALERT: check formula stoichiometry or atom site occupancies.  
From the CIF: \_cell\_formula\_units\_Z    4  
From the CIF: \_chemical\_formula\_sum Cl Cu3.75 Na2.25 O9 P2  
TEST: Compare cell contents of formula and atom\_site data

| atom | Z*formula | cif sites | diff  |
|------|-----------|-----------|-------|
| Cl   | 4.00      | 4.00      | 0.00  |
| Cu   | 15.00     | 14.96     | 0.04  |
| Na   | 9.00      | 9.04      | -0.04 |
| O    | 36.00     | 36.00     | 0.00  |
| P    | 8.00      | 8.00      | 0.00  |

PLAT004\_ALERT\_5\_G Polymeric Structure Found with Maximum Dimension    3 Info  
PLAT045\_ALERT\_1\_G Calculated and Reported Z Differ by a Factor ...    0.250 Check  
PLAT068\_ALERT\_1\_G Reported F000 Differs from Calcd (or Missing)...    Please Check  
PLAT168\_ALERT\_4\_G The CIF-Embedded .res File Contains EXYZ Records    1 Report  
PLAT171\_ALERT\_4\_G The CIF-Embedded .res File Contains EADP Records    1 Report  
PLAT301\_ALERT\_3\_G Main Residue Disorder .....(Resd 1 )    17% Note  
PLAT794\_ALERT\_5\_G Tentative Bond Valency for Cu1    (II)    .    2.10 Info  
PLAT794\_ALERT\_5\_G Tentative Bond Valency for Cu2    (II)    .    2.05 Info  
PLAT802\_ALERT\_4\_G CIF Input Record(s) with more than 80 Characters    3 Info  
PLAT899\_ALERT\_4\_G SHELXL2018 is Deprecated and Succeeded by SHELXL    2019/3 Note  
PLAT961\_ALERT\_5\_G Dataset Contains no Negative Intensities .....    Please Check  
PLAT965\_ALERT\_2\_G The SHELXL WEIGHT Optimisation has not Converged    Please Check  
PLAT967\_ALERT\_5\_G Note: Two-Theta Cutoff Value in Embedded .res ..    60.0 Degree

---

0 **ALERT level A** = Most likely a serious problem - resolve or explain

1 **ALERT level B** = A potentially serious problem, consider carefully  
3 **ALERT level C** = Check. Ensure it is not caused by an omission or oversight  
16 **ALERT level G** = General information/check it is not something unexpected

6 ALERT type 1 CIF construction/syntax error, inconsistent or missing data  
4 ALERT type 2 Indicator that the structure model may be wrong or deficient  
1 ALERT type 3 Indicator that the structure quality may be low  
4 ALERT type 4 Improvement, methodology, query or suggestion  
5 ALERT type 5 Informative message, check

---

It is advisable to attempt to resolve as many as possible of the alerts in all categories. Often the minor alerts point to easily fixed oversights, errors and omissions in your CIF or refinement strategy, so attention to these fine details can be worthwhile. In order to resolve some of the more serious problems it may be necessary to carry out additional measurements or structure refinements. However, the purpose of your study may justify the reported deviations and the more serious of these should normally be commented upon in the discussion or experimental section of a paper or in the "special\_details" fields of the CIF. checkCIF was carefully designed to identify outliers and unusual parameters, but every test has its limitations and alerts that are not important in a particular case may appear. Conversely, the absence of alerts does not guarantee there are no aspects of the results needing attention. It is up to the individual to critically assess their own results and, if necessary, seek expert advice.

### **Publication of your CIF in IUCr journals**

A basic structural check has been run on your CIF. These basic checks will be run on all CIFs submitted for publication in IUCr journals (*Acta Crystallographica*, *Journal of Applied Crystallography*, *Journal of Synchrotron Radiation*); however, if you intend to submit to *Acta Crystallographica Section C* or *E* or *IUCrData*, you should make sure that full publication checks are run on the final version of your CIF prior to submission.

### **Publication of your CIF in other journals**

Please refer to the *Notes for Authors* of the relevant journal for any special instructions relating to CIF submission.

---

**PLATON version of 14/11/2023; check.def file version of 14/09/2023**

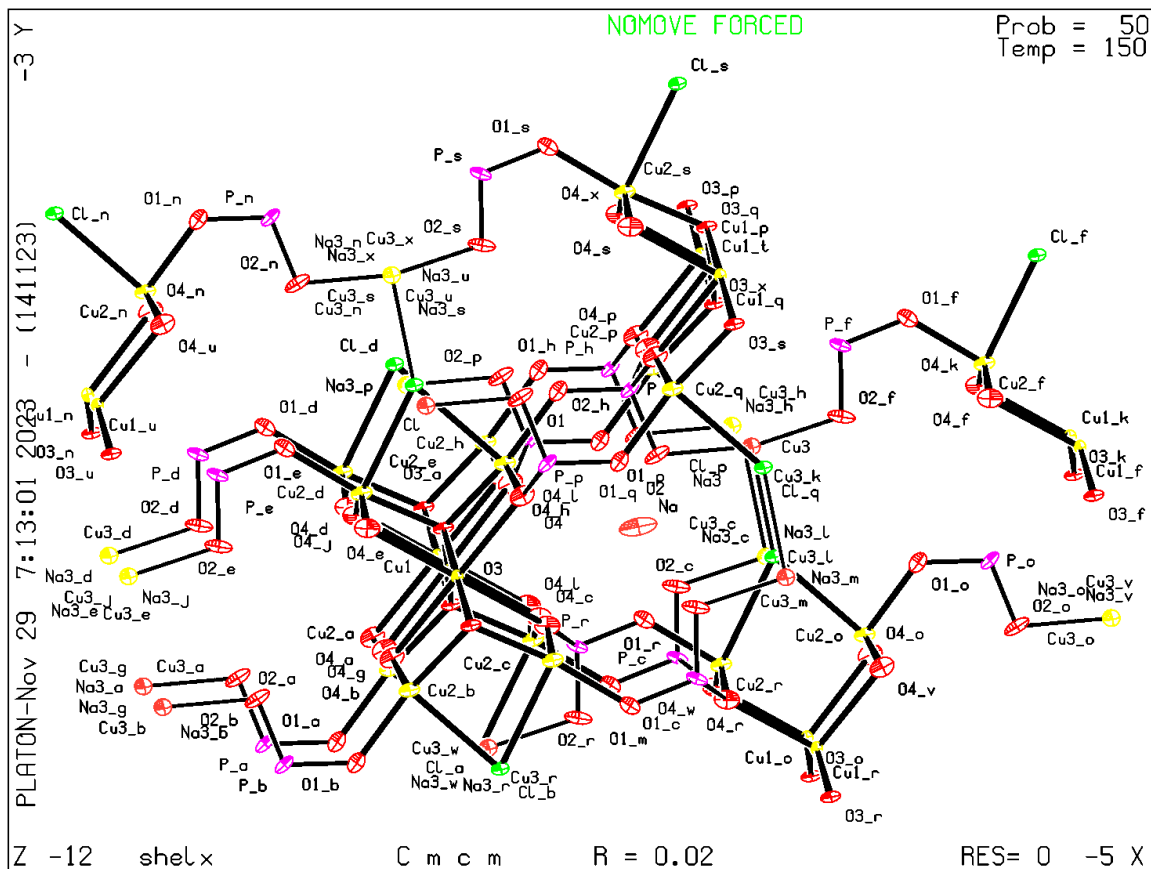

Supplement: s1 [file s1]
