# Supplementary material for: Mineral-like Synthetic Compounds Stabilized under Hydrothermal Conditions: X-ray Diffraction Study and Comparative Crystal Chemistry
Source: MDPI journal article supplement (doi:10.3390/min14010046), 2023-12-29
Supplement: s1 [file s1]

---

The following ALERTS were generated. Each ALERT has the format

**test-name\_ALERT\_alert-type\_alert-level.**

Click on the hyperlinks for more details of the test.

---

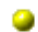

### Alert level C

|                   |                                                  |       |              |
|-------------------|--------------------------------------------------|-------|--------------|
| PLAT088_ALERT_3_C | Poor Data / Parameter Ratio .....                | 8.44  | Note         |
| PLAT767_ALERT_4_C | INS Embedded LIST 6 Instruction Should be LIST 4 |       | Please Check |
| PLAT906_ALERT_3_C | Large K Value in the Analysis of Variance .....  | 5.318 | Check        |

---

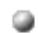

### Alert level G

FORMU01\_ALERT\_1\_G There is a discrepancy between the atom counts in the  
\_chemical\_formula\_sum and \_chemical\_formula\_moiety. This is  
usually due to the moiety formula being in the wrong format.  
Atom count from \_chemical\_formula\_sum: H2 Na3 O9 P2 V1  
Atom count from \_chemical\_formula\_moiety: H4 Na6 O18 P4 V2

|                   |                                                                                         |       |        |
|-------------------|-----------------------------------------------------------------------------------------|-------|--------|
| PLAT002_ALERT_2_G | Number of Distance or Angle Restraints on AtSite                                        | 4     | Note   |
| PLAT004_ALERT_5_G | Polymeric Structure Found with Maximum Dimension                                        | 1     | Info   |
| PLAT045_ALERT_1_G | Calculated and Reported Z Differ by a Factor ...                                        | 0.500 | Check  |
| PLAT171_ALERT_4_G | The CIF-Embedded .res File Contains EADP Records                                        | 1     | Report |
| PLAT172_ALERT_4_G | The CIF-Embedded .res File Contains DFIX Records                                        | 1     | Report |
| PLAT199_ALERT_1_G | Reported _cell_measurement_temperature ..... (K)                                        | 293   | Check  |
| PLAT200_ALERT_1_G | Reported _diffrn_ambient_temperature ..... (K)                                          | 293   | Check  |
| PLAT794_ALERT_5_G | Tentative Bond Valency for V1 (III) .                                                   | 2.94  | Info   |
| PLAT802_ALERT_4_G | CIF Input Record(s) with more than 80 Characters                                        | 1     | Info   |
| PLAT860_ALERT_3_G | Number of Least-Squares Restraints .....                                                | 2     | Note   |
| PLAT870_ALERT_4_G | ALERTS Related to Twinning Effects Suppressed ..                                        | !     | Info   |
| PLAT909_ALERT_3_G | Percentage of I>2sig(I) Data at Theta(Max) Still                                        | 65%   | Note   |
| PLAT931_ALERT_5_G | CIFcalcFCF Twin Law ( 1 0 0) Est.d BASF                                                 | 0.48  | Check  |
| PLAT933_ALERT_2_G | Number of HKL-OMIT Records in Embedded .res File<br>3 -9 3, 5 9 -3, -11 -7 5, -10 6 -6, | 4     | Note   |
| PLAT941_ALERT_3_G | Average HKL Measurement Multiplicity .....                                              | 1.8   | Low    |
| PLAT967_ALERT_5_G | Note: Two-Theta Cutoff Value in Embedded .res ..                                        | 50.0  | Degree |

---

- 0 **ALERT level A** = Most likely a serious problem - resolve or explain  
0 **ALERT level B** = A potentially serious problem, consider carefully  
3 **ALERT level C** = Check. Ensure it is not caused by an omission or oversight  
17 **ALERT level G** = General information/check it is not something unexpected

- 4 ALERT type 1 CIF construction/syntax error, inconsistent or missing data  
2 ALERT type 2 Indicator that the structure model may be wrong or deficient  
5 ALERT type 3 Indicator that the structure quality may be low  
5 ALERT type 4 Improvement, methodology, query or suggestion  
4 ALERT type 5 Informative message, check
- 
-



It is advisable to attempt to resolve as many as possible of the alerts in all categories. Often the minor alerts point to easily fixed oversights, errors and omissions in your CIF or refinement strategy, so attention to these fine details can be worthwhile. In order to resolve some of the more serious problems it may be necessary to carry out additional measurements or structure refinements. However, the purpose of your study may justify the reported deviations and the more serious of these should normally be commented upon in the discussion or experimental section of a paper or in the "special\_details" fields of the CIF. checkCIF was carefully designed to identify outliers and unusual parameters, but every test has its limitations and alerts that are not important in a particular case may appear. Conversely, the absence of alerts does not guarantee there are no aspects of the results needing attention. It is up to the individual to critically assess their own results and, if necessary, seek expert advice.

### **Publication of your CIF in IUCr journals**

A basic structural check has been run on your CIF. These basic checks will be run on all CIFs submitted for publication in IUCr journals (*Acta Crystallographica*, *Journal of Applied Crystallography*, *Journal of Synchrotron Radiation*); however, if you intend to submit to *Acta Crystallographica Section C* or *E* or *IUCrData*, you should make sure that full publication checks are run on the final version of your CIF prior to submission.

### **Publication of your CIF in other journals**

Please refer to the *Notes for Authors* of the relevant journal for any special instructions relating to CIF submission.
